# Supplementary material for: Fishers’ knowledge detects ecological decay in the Mediterranean Sea
Source: PubMed Central journal article supplement (PMC8068750; doi:10.1007/s13280-020-01452-3), 2021-01-16
Supplement: 13280_2020_1452_MOESM1_ESM.pdf [file 13280_2020_1452_MOESM1_ESM.pdf]

**Ambio**

Electronic Supplementary Material

*This supplementary material has not been peer reviewed.*

Title: Fishers' Knowledge Detects Ecological Decay in the Mediterranean Sea

Authors: Benedetta Veneroni, Paul G. Fernandes

## QUESTIONNAIRE

Number: \_\_\_ Date: \_\_\_\_\_ Place: \_\_\_\_\_ Sector: \_\_\_\_\_

Name: \_\_\_\_\_

Age: \_\_\_\_\_

Year of starting activity: \_\_\_\_\_

Year of ending activity/still in activity: \_\_\_\_\_

1. Is fishing a family activity for you? \_\_\_\_\_

### 2. Main Gear

|                                                               | <b>From<br/>60's to<br/>70's</b> | <b>From<br/>70's to<br/>80's</b> | <b>From 80's<br/>to 90's</b> | <b>From 90's<br/>to 2000's</b> | <b>From<br/>2000's to<br/>2010's</b> | <b>From<br/>2010's to<br/>present</b> |
|---------------------------------------------------------------|----------------------------------|----------------------------------|------------------------------|--------------------------------|--------------------------------------|---------------------------------------|
| <b>Vessel size (m)</b>                                        |                                  |                                  |                              |                                |                                      |                                       |
| <b>Type</b><br>(local name)                                   |                                  |                                  |                              |                                |                                      |                                       |
| <b>Length and<br/>width of the<br/>net (m)</b><br>(mean size) |                                  |                                  |                              |                                |                                      |                                       |
| <b>Vertical<br/>opening (m)</b>                               |                                  |                                  |                              |                                |                                      |                                       |
| <b>Mesh size</b><br>(+cod end)<br>(mm)                        |                                  |                                  |                              |                                |                                      |                                       |
| <b>Vessel power</b><br>(hp)                                   |                                  |                                  |                              |                                |                                      |                                       |

3. How would you describe the current conditions of fish stocks regarding abundance?  
 unaltered  declined  augmented

4. Do you know any overexploited species by fisheries in this region?  Yes  No

5. If Yes, which species? \_\_\_\_\_

6. What was the largest amount of sole that you captured in a day (in *casse*)? \_\_\_\_\_

7. When? \_\_\_\_\_

8. What was the largest amount of cuttle fish that you captured in a day (in *casse*)? \_\_\_\_\_

9. When? \_\_\_\_\_

10. What was the largest amount of mantis shrimp that you captured in a day (in *casse*)? \_\_\_\_\_

11. When? \_\_\_\_\_

12. What was the largest amount of red mullet that you captured in a day (in *casse*)? \_\_\_\_\_

13. When? \_\_\_\_\_

14. Please, list the names of all the benthic species you

remember: \_\_\_\_\_

15. Of all these species, which ones you think have decreased in

numbers? \_\_\_\_\_

16. Do you think that the past generations of fishermen were able to witness a seabed richer in benthic species?

yes  no  I don't know

17. If yes, what do you think is the main cause for a disruption in the benthic

habitat? \_\_\_\_\_

18. In your opinion, what would be a solution to such disruption? \_\_\_\_\_

19. In your opinion, how important is seafloor integrity for the maintenance of abundant demersal fish? Tick **one** of the following boxes.

- Not important
- Relatively important
- Really important
- Essential
- I don't know/ I cannot answer
